# Supplementary material for: Colonization of intervertebral discs by Cutibacterium acnes in patients with low back pain: Protocol for an analytical study with microbiological, phenotypic, genotypic, and multiomic techniques
Source: PubMed Central journal article supplement (PMC9970075; doi:10.1371/journal.pone.0271773), 2023-02-27
Supplement: pone.0271773.s002.pdf [file pone.0271773.s002.pdf]

**ClinicalTrials.gov Protocol Registration and Results System (PRS) Receipt**  
Release Date: October 11, 2021

**ClinicalTrials.gov ID: NCT05090553**

---

### Study Identification

Unique Protocol ID: VMRDocProtocol\_2021

Brief Title: Protocol for an Analytical Study With Microbiological, Phenotypic, Genotypic and Multiomics Techniques

Official Title: Cutibacterium Acnes Colonization on Intervertebral Discs of Patients With Low Back Pain: Protocol for an Analytical Study With Microbiological, Phenotypic, Genotypic and Multiomics Techniques

Secondary IDs:

### Study Status

Record Verification: October 2021

Overall Status: Active, not recruiting

Study Start: August 1, 2021 [Actual]

Primary Completion: March 1, 2022 [Anticipated]

Study Completion: October 1, 2022 [Anticipated]

### Sponsor/Collaborators

Sponsor: Gaffree & Guinle Universitary Hospital

Responsible Party: Principal Investigator

Investigator: Vinicius Magno da Rocha [vdarocha]

Official Title: Clinical Professor

Affiliation: Gaffree & Guinle Universitary Hospital

Collaborators: Coordenação de Aperfeiçoamento de Pessoal de Nível Superior.  
Conselho Nacional de Desenvolvimento Científico e Tecnológico

### Oversight

U.S. FDA-regulated Drug: No

U.S. FDA-regulated Device: No

U.S. FDA IND/IDE: No

Human Subjects Review: Board Status: Approved

Approval Number: 50077521.0.0000.5258

Board Name: Vinicius Magno da Rocha, Jorge Leite and Rossano Fiorelli

Board Affiliation: Research Ethics Committee of the Gaffrée & Guinle  
Universitary Hospital

Phone: 55 21 99700-7240

Email: professorviniciusmagno@edu.unirio.br

Address:

Rio de Janeiro, RJ, Brazil, 20270-004

Data Monitoring: No

FDA Regulated Intervention: No

## Study Description

**Brief Summary:** The study aims to identify metabolites present in intervertebral discs colonized by *C. acnes* from patients with low back pain and degenerative disc disease, correlating them with their clinical, radiological and demographic profiles.

**Detailed Description:**

## Conditions

**Conditions:** Back Pain, Low  
Degenerative Disc Disease

**Keywords:**

## Study Design

**Study Type:** Interventional

**Primary Purpose:** Basic Science

**Study Phase:** N/A

**Interventional Study Model:** Factorial Assignment

**Number of Arms:** 4

**Masking:** Quadruple (Participant, Care Provider, Investigator, Outcomes Assessor)  
Neither the patient nor the surgeons will have access to the results of microbiological cultures or molecular analysis. The radiologist who will review the exams will also be blinded to patient data and laboratory results. The researcher who will analyze the pain and function scores will also be blinded.

**Allocation:** Randomized

**Enrollment:** 120 [Anticipated]

## Arms and Interventions

| Arms                                                                                                                                                                                                                      | Assigned Interventions                                                                                                                                                                                                            |
|---------------------------------------------------------------------------------------------------------------------------------------------------------------------------------------------------------------------------|-----------------------------------------------------------------------------------------------------------------------------------------------------------------------------------------------------------------------------------|
| Active Comparator: surgical treatment<br>Lumbar Spinal Fusion Surgery                                                                                                                                                     | Procedure/Surgery: Lumbar Spinal Fusion Surgery<br>During surgery will be collected five disc fragments and five fragments of muscle-ligament tissue adjacent to the collected disc.                                              |
| Experimental: Bacterial culture<br>Cutibacterium acnes culture in two different atmosphere: <ul style="list-style-type: none"><li>• Carbon dioxide (CO2) from 5% up to 10%</li><li>• CO2 10%, H2 10% and N2 80%</li></ul> | Biological/Vaccine: Bacterial culture<br>Samples will be seeded on blood agar and anaerobic blood agar plates. After sowing in solid media, the swab will be inoculated in thioglycolate medium, where it will remain for 14 days |
| Experimental: Phenotypic and genotypic characterization                                                                                                                                                                   | Genetic: Phenotypic and genotypic characterization                                                                                                                                                                                |

| Arms                                                                                                                                                  | Assigned Interventions                                                                                                                                                                                                                                                                                                                                                                                         |
|-------------------------------------------------------------------------------------------------------------------------------------------------------|----------------------------------------------------------------------------------------------------------------------------------------------------------------------------------------------------------------------------------------------------------------------------------------------------------------------------------------------------------------------------------------------------------------|
| Mass spectrometry and (Polimerase Chain Reaction) PCR                                                                                                 | The phenotypic identification of the species will be carried out through mass spectrometry, with the MALDI-TOF equipment. PCR analyzes performed in two phases, the first to confirm the presence of bacteria (target and non-target) using primers capable of amplifying eubacteria ribosomal deoxyribonucleic acid (rDNA) 16s and the second directed to confirm C. acnes through specific rDNA 16s primers. |
| Experimental: Multiomics analysis <ul style="list-style-type: none"> <li>• Genome sequencing</li> <li>• Proteomics</li> <li>• Metabolomics</li> </ul> | Genetic: Multiomics analysis<br>Whole Genome Sequencing, proteomics and metabolomics analysis                                                                                                                                                                                                                                                                                                                  |

## Outcome Measures

Primary Outcome Measure:

1. Incidence of C. acnes on intervertebral disc  
Incidence of C. acnes on intervertebral disc in patients with chronic low back pain and DDL.

[Time Frame: Up to 5 months]

## Eligibility

Minimum Age: 18 Years

Maximum Age: 65 Years

Sex: All

Gender Based: No

Accepts Healthy Volunteers: No

Criteria: Inclusion Criteria:

- low back pain lasting longer than 3 months;
- MRI findings of degenerative lumbar discopathy (DDL) performed less than 6 months after inclusion in the study;
- indication for open surgical treatment, with isolated microdiscectomy or associated with lumbar arthrodesis;
- failure of conservative treatment for at least 6 weeks and/or progressive neurological deficit

Exclusion Criteria:

- History of open lumbar spine surgery at any stage of life;
- presence of chemotherapy or pulse therapy with corticoids;
- patients with immune deficiency;
- patients undergoing previous intradiscal therapies (nucleotomy or discography);
- patients undergoing previous endoscopic surgery;
- patients with a history of previous spinal infection treated with antibiotics in the 6 months prior to inclusion in the study;
- use of antibiotics in the 2 months prior to the surgical procedure

## Contacts/Locations

Central Contact Person: Vinicius M da Rocha, MD

Telephone: 55 21 99700-7240  
Email: [viniciusmagnodarocha@gmail.com](mailto:viniciusmagnodarocha@gmail.com)

Central Contact Backup:

Study Officials:

Locations: **Brazil**

Hospital Universitário Gaffrée e Guinle

Rio de Janeiro, Brazil, 20270-004

Contact: Vinicius M da Rocha, MD 55 21 99700-7240  
[viniciusmagnodarocha@gmail.com](mailto:viniciusmagnodarocha@gmail.com)

## IPDSharing

Plan to Share IPD:

## References

Citations:

Links:

Available IPD/Information:
